# Supplementary material
Source: publisher site journal article supplement (https://www.dovepress.com/article/335219)
Supplement: Supplementary file 1 [file get_supplementary_file.php]

# 1 Figure 1. Interview Questions

1. At the time of your heart attack, can you describe to me what you were feeling?
2. Did you think you were having a heart attack?
3. If you did not, what did you think was happening?
4. Did you take any medication at that time?
5. Did you call your doctor?
6. Did you call a family member or a close friend?
7. Did you call 911?
8. Who did you call first?
9. How long did you wait until you decided to go to the hospital?
10. Was there anything that made you wait or hesitate before going to the hospital?
11. How did you get to the hospital?
12. What language do you speak at home?
13. How is your level of English comprehension?
  - A. Very good English comprehension or fluent in English
  - B. Some English Comprehension (speaks some sentences but cannot carry out a detailed conversation)
  - C. Very little or no English comprehension (at most knows some words)
14. For those who answered question 10 as b, or c: How did you communicate with:
  - A. EMS
  - B. The Hospital staff
15. Where were you born?
16. How many years have you lived in the US?
17. What is the highest level of education that you achieved?
18. What was your employment status at the time of your heart attack?
19. What religion do you practice?
20. Since your heart attack, have you:
  - A. Had another heart attack?
  - B. Been admitted to the hospital for heart failure
  - C. Had another angioplasty/stent (balloon procedure)

2

3

4
